# Supplementary material
Source: PubMed Central journal article supplement (PMC5441957)
Supplement: NIHMS855574-supplement.pdf [file NIHMS855574-supplement.pdf]

**Keywords**

clinical trials, systematic reviews; outcomes; HIV/AIDS

**Conflicts of interest**

None
